# Supplementary material
Source: HighWire-hosted journal article supplement (https://www.cmajopen.ca/highwire/filestream/81353/field_highwire_adjunct_files/0/2020-0110-original-submission.pdf)
Supplement: 2020-0110-original-submission.pdf [file 2020-0110-original-submission.pdf]

1  
2  
3  
4  
5  
6  
7  
8  
9  
10  
11  
12  
13  
14  
15  
16  
17  
18  
19  
20  
21  
22  
23  
24  
25  
26  
27  
28  
29  
30  
31  
32  
33  
34  
35  
36  
37  
38  
39  
40  
41  
42  
43  
44  
45  
46  
47  
48  
49  
50  
51  
52  
53  
54  
55  
56  
57  
58  
59  
60

**Communicating the COVID-19 Crisis:**  
**A Rapid Thematic Analysis of Official Statements from Canada's Top Doctors**

Patrick Fafard, PhD<sup>ab</sup>  
Lindsay A. Wilson, MSc<sup>a</sup>  
Adèle Cassola, PhD<sup>a</sup>  
Steven J. Hoffman, JD, PhD<sup>acde</sup>

<sup>a</sup>Global Strategy Lab, York University/University of Ottawa, ON, Canada

<sup>b</sup>Graduate School of Public & International Affairs, Faculty of Social Science, University of Ottawa, Ottawa, ON, Canada

<sup>c</sup>Dahdaleh Institute for Global Health Research, Faculty of Health and Osgoode Hall Law School, York University, ON, Canada

<sup>d</sup>Department of Global Health and Population, Harvard T H Chan School of Public Health, Harvard University, Boston, MA, USA

<sup>e</sup>Department of Health Research Methods, Evidence, and Impact and McMaster Health Forum, McMaster University, Hamilton, ON, Canada

Corresponding Author:

Patrick Fafard PhD  
University of Ottawa  
Room 6049, FSS Building, 120 University Private,  
Ottawa, ON, Canada K1N 6N5  
Email: patrick.fafard@globalstrategylab.org  
Tel: +1 (613) 562-5800 ext. 4186

Contributors: Patrick Fafard and Steven J. Hoffman conceived the study. Lindsay A. Wilson and Adèle Cassola analyzed the data and drafted the manuscript. All authors contributed to study design and interpretation, revised the manuscript critically for intellectual content, approved the final version to be published, and agreed to be accountable for all aspects of the work.

Competing interests: Steven J. Hoffman is Scientific Director of the Institute of Population and Public Health at the Canadian Institutes of Health Research (CIHR). The views expressed in this article are those of the authors and do not necessarily reflect those of CIHR or the Government of Canada.

Funding: This work was supported by the Canadian Institutes of Health Research (Grant # NFRFR-2019-00003).

## Abstract

**Background:** During the COVID-19 crisis, Canada's Chief Medical Officers of Health (CMOHs) have provided regular and high-profile updates on the pandemic response. We analyzed the key messages they have conveyed to the public, paying particular attention to variation in messaging over time and across jurisdictions.

**Methods:** We conducted a comprehensive thematic analysis of all news releases on government websites that were issued by or with the CMOHs of each province during the initial phases of the COVID-19 outbreak. We analysed 290 releases issued between January 21 and March 31, 2020.

**Results:** Messaging across jurisdictions was surprisingly consistent. News releases described the government's preparedness and capacity-building; issued recommendations and mandates; reassured and encouraged the public; and promoted public responsibility. The majority of messages were prescriptive, conveying recommendations and mandates to slow transmission. Cross-jurisdictional variations in messaging reflected local realities, such as evidence of community transmission, and the different roles that provinces ascribe to their CMOHs. Messaging also reflected changing information about the pandemic over time, shifting from a tone of reassurance early on, to a sudden emphasis on social distancing measures, to a concern with public responsibility to slow transmission.

**Interpretation:** Official statements from Canada's top doctors must be evaluated in the context of the information they possess, circumstances in their jurisdiction, and the role in which they are cast. Our analysis indicates inherent tensions in the design of the CMOH position, with their independence in non-crisis situations pitted against their role as the face of the government response in emergencies.

## Introduction

Canada's Chief Medical Officers of Health (CMOHs)<sup>1</sup> have multiple roles, including advising elected officials and speaking on their behalf as trusted scientific experts during emergencies (1,2). Over the course of the COVID-19 crisis, CMOHs have become household names, providing regular updates on the pandemic and the government's response to it. Public opinion data from the COVID-19 outbreak indicate that Canadians have a high degree of trust in CMOHs and strongly value the role of scientific evidence and medical advice in government decision-making and emergency response (3). The confidence placed in these public health officials underscores the importance of understanding the messages they convey to the public.

While Canada's top doctors have received extensive praise for their handling of the crisis, they have also faced scrutiny over issues such as the consistency of their messaging across jurisdictions and over time (e.g. 4,5). We analyzed the key messages that Canada's CMOHs have conveyed to the public during the initial phases of the COVID-19 crisis, paying particular attention to cross-provincial and temporal variation. We found that messaging across jurisdictions was largely consistent, with variations reflecting each province's unique local context and changing epidemiological information.

## Methods

We conducted a comprehensive thematic analysis of all news releases on government websites that were published by or with the CMOHs of each province since the beginning of the COVID-19 outbreak. We analysed 290 news releases issued between January 21 and March 31, 2020. Each news release was read in its entirety and coded according to the key messages it contained. We then constructed conceptual themes that allowed us to connect similar messages under common headings to facilitate more meaningful interpretation and analysis. Finally, we conducted a comparative analysis exploring the frequency and timing of each theme between and within provinces (Table 1).

While CMOHs have used various communication channels throughout the pandemic, we focused on news releases because they were consistently employed across most provinces and, as highly regulated communications, can be presumed to reflect CMOHs' official positions. We did not include messaging through other channels, such as press conferences and social media. Since the federal Chief Public Health Officer has relied primarily on daily press conferences rather than news releases to communicate with the public, only provincial CMOHs were included in our analysis. As our analysis was conducted on publicly available statements, no ethics approval was required.

---

<sup>1</sup> The title of the senior public health official varies by jurisdiction. The most common term in Canadian jurisdictions is Chief Medical Officer of Health. Henceforth in this article, we use this term collectively to refer to the provincial officials who occupy this position.

## Results

### Themes Addressed in CMOH Communications

Provincial governments began issuing official news releases about COVID-19 at different times and vary in the number released (Table 1). Provinces also employed different approaches to these communications. While CMOHs occasionally issued news releases alone (or, in the case of Prince Edward Island, used this as the main approach), the majority of CMOHs most commonly issued joint releases with elected officials such as the Premier or Minister of Health (Table 1).

The statements we reviewed consistently fell into four broad thematic categories: 1) describing the government's preparedness and capacity-building; 2) issuing recommendations and mandates; 3) expressing reassurance and encouraging the public; and 4) promoting public responsibility.

#### *1) Describing Preparedness and Capacity-Building*

These themes described the approach taken by each jurisdiction as officials explored how best to prepare for and respond to COVID-19. News releases reflecting this theme communicated government efforts to understand the scope of the pandemic and outlined measures taken by the government and public health officials to address it. Statements typically relied on epidemiological data and outlined contingency plans for addressing healthcare resource scarcity.

#### *2) Issuing Recommendations and Mandates*

News releases often communicated recommendations and restrictions to slow the spread of COVID-19 through social distancing, event cancellations, workplace and school closures, and travel-related self-monitoring and isolation. They also addressed the enforcement of these measures and included cases where CMOHs characterized (or used their statutory authority to declare) the pandemic as a public health emergency that both permitted and required the government to impose stricter regulations.

#### *3) Expressing Reassurance and Encouraging the Public*

These themes emerged in statements oriented toward reassuring the public and mitigating panic. These news releases generally discouraged fear, reminded individuals that normal life would eventually resume, encouraged ongoing cooperation with restrictions, and praised positive contributions from healthcare workers and the public. They often referred to the low risk of transmission, particularly at the beginning of the pandemic, and to public health experts who should be relied upon to handle the situation.

#### *4) Promoting Public Responsibility*

Themes in this category characterized public health as a collective responsibility. They emphasized the importance of changing individual behaviours to prevent disease transmission

1  
2  
3 and called upon everyone to “do their part”. Statements provided the public with information  
4 about COVID-19, including symptoms and methods of prevention. While the majority of news  
5 releases in this category focused on working together toward a common goal, some reprimanded  
6 those who were not abiding by the restrictions and admonished them for putting others at risk.  
7  
8

9  
10 [INSERT TABLE 1]  
11

### 12 Consistency and Variation in CMOH Communications Across Jurisdictions

13 As illustrated in Table 1, the themes communicated by each province showed many similarities.  
14 In particular, prescriptive themes relating to cancellations, closures, and other social distancing  
15 measures appeared in over half of news releases issued by eight of the ten provinces and in over  
16 one-third of the releases issued by the remaining two provinces. As shown in Figure 1, this  
17 consistency was also reflected in the actions that provinces took to address the pandemic.  
18  
19

20  
21 Across jurisdictions, news releases were also used for broadly similar purposes. In keeping with  
22 their role within the government (as opposed to being at arm’s length), statements by and with  
23 CMOHs have been used to inform the public of the provincial government’s pandemic response  
24 rather than to question or criticize it. However, there were rare occasions where provincial  
25 communications questioned the federal response to COVID-19 or urged stronger action. For  
26 example, early in the pandemic, news releases from Quebec urgently called on the federal  
27 government to limit entry to foreign visitors, stating that it was inconsistent to ask Quebec’s  
28 population to self-isolate after travelling abroad without also restricting incoming travel (6,7).  
29  
30  
31

32  
33 News releases commonly referred to advice from the World Health Organization and the Public  
34 Health Agency of Canada as guiding policy and planning decisions and emphasized the ongoing  
35 communication and coordination among officials at the pan-Canadian level. However, evolving  
36 local circumstances also played an important role in provincial governments’ messaging. For  
37 example, early recommendations often focused on ensuring recent travelers took appropriate  
38 precautions upon returning to Canada. In many cases, these recommendations shifted to broader  
39 social distancing measures for everyone once community transmission had been provincially  
40 documented. Evidence of community transmission (or lack thereof) was cited as a primary factor  
41 in the timing of major policy decisions regarding closures and restrictions in Alberta,  
42 Saskatchewan and New Brunswick and was also referenced in relation to widespread social  
43 distancing measures in British Columbia, Nova Scotia and Prince Edward Island (8–13). In  
44 Alberta, for example, evidence of community transmission was cited as a driving factor in the  
45 decision to close schools, childcare facilities, and other gathering sites just two days after issuing  
46 a recommendation that schools should remain open (10). Similarly, in New Brunswick, testing  
47 protocols were changed considerably to allow individuals who had not travelled to be tested as  
48 a direct result of the first evidence of community transmission (9).  
49  
50  
51  
52  
53  
54  
55  
56  
57  
58  
59  
60

1  
2  
3 The local differences in communications that we observed were also consistent with the varying  
4 roles that CMOHs play across jurisdictions. No two provinces structure the CMOH role in the  
5 same way, with each province putting different emphases on CMOHs' advisory, management,  
6 and communications roles, which in turn shape what these officials can say to the public and  
7 how they deliver their message (1,2). In jurisdictions that emphasize the CMOH's technical  
8 advisory role (i.e., NL, PE, SK), news releases primarily conveyed factual information about  
9 COVID-19 and measures to contain it (Table 1). In provinces that give more emphasis to the  
10 CMOH's role in communicating independent information to the public (i.e., BC, MB, NB, ON),  
11 statements typically covered a wider range of themes, with messages of reassurance and/or  
12 collective responsibility intermingling with messages on containment measures. Those provinces  
13 where the CMOH's internal role as a high-level advisor and/or manager is emphasized (i.e., AB,  
14 NS, QC) were less consistent in the content of their messaging, but they all relied almost  
15 exclusively on statements issued with elected officials, consistent with the CMOH's positioning  
16 as a loyal public servant.  
17  
18  
19  
20  
21  
22

### 23 Variations in Messaging Over Time

24 During the pandemic, information about the virus and its local prevalence has changed  
25 continuously, and government communications have shifted in tandem (Table 2). Statements  
26 released early in the pandemic frequently expressed reassurance. This theme appeared in a  
27 considerable proportion of news releases in Quebec (67%), British Columbia (48%), and Ontario  
28 (46%), but considerably less often in Alberta (13%), Nova Scotia (14%), Newfoundland (14%)  
29 and PEI (15%) (Table 1). Reassurance also appeared less frequently over time even among the  
30 provinces that expressed it most frequently, with steep declines over the January to March 2020  
31 study period in British Columbia, Manitoba, and Ontario.  
32  
33  
34  
35

36 [INSERT TABLE 2]  
37  
38

39 Reflecting growing national and international concern, as well as consistently-timed action  
40 across Canada (Figure 1), references to cancellations and social distancing recommendations  
41 emerged quite suddenly in the week of March 8-14 for all provinces except British Columbia,  
42 where the theme appeared one week earlier. Similarly, mentions of collective responsibility  
43 became concentrated later in the outbreak in nearly all jurisdictions. In Alberta, Saskatchewan,  
44 Ontario, Prince Edward Island, and Newfoundland & Labrador, all communications mentioning  
45 this theme were released on or after March 15. Similar trends appeared in British Columbia, New  
46 Brunswick, and Nova Scotia, where the majority of references to this theme also appeared after  
47 this date.  
48  
49  
50

51 [INSERT FIGURE 1]  
52  
53  
54  
55  
56  
57  
58  
59  
60

1  
2  
3 CMOHs often referenced the rapidly-changing epidemiological and information landscape to  
4 explain the government's latest response and advice. This contextualization was particularly  
5 pronounced early in the pandemic, when officials emphasized the novelty of the situation, the  
6 daily increase in knowledge about the virus and its transmission, and the adjustments that  
7 governments were making based on new evidence.  
8  
9

### 10 11 **Interpretation**

12 Throughout the COVID-19 pandemic, news releases issued by or with CMOHs have generally  
13 been used as a means of engaging the public. The majority of messages have been prescriptive,  
14 offering recommendations and mandates to slow transmission. There was notable consistency  
15 overall in the content of news releases across jurisdictions. This consistency may be the result of  
16 the ongoing frequent communication among CMOHs on a pan-Canadian level as well as the  
17 broadly similar purpose of news releases across provinces. While we did document variations in  
18 the tone and timing of certain messaging, this was in line with different and changing realities  
19 across contexts. The trajectory and severity of the COVID-19 pandemic has not been uniform  
20 across jurisdictions, and provinces' differing demographics and healthcare capacities create  
21 different underlying risk profiles. We find that provincial news releases carefully and  
22 appropriately balanced the national and international situation with attention to specific and  
23 shifting local circumstances.  
24  
25  
26  
27  
28

29 Our analysis adds an important dimension to the literature on the multi-faceted roles of CMOHs  
30 and CPHOs (1,2). In particular, we show how the previously-analyzed statutory duty to  
31 communicate with the public plays out in practice during an emergency, and demonstrate that the  
32 different models of the position identified in previous work have implications for CMOHs'  
33 public communications (1). Further, we show that the integration of the position within  
34 government, which has previously been identified as involving trade-offs (1,2), manifests in a  
35 communications model that positions the CMOH as part of a broader government crisis response  
36 team.  
37  
38  
39  
40

41 This study has important implications for CMOH communications specifically and for their role  
42 as senior public health officials more broadly. The media, scientific community, and general  
43 public must evaluate the content of top doctors' messages in the context of the information these  
44 officials have at their disposal, circumstances in their jurisdiction, and the role in which they are  
45 cast. Rather than prioritizing consistency at all costs, we should continue to leverage the benefits  
46 of having provincial-level CMOHs who can tailor their responses to their jurisdiction's local  
47 context while also sharing information and coordinating measures at the pan-Canadian level. In  
48 their communications, CMOHs should maximize transparency regarding the information and  
49 events driving their decisions, in order to clarify the bases for differences over time and across  
50 jurisdictions – particularly in a federal context like Canada where varying messages across  
51 provinces, however appropriate locally, might generate confusion.  
52  
53  
54  
55  
56  
57  
58  
59  
60

1  
2  
3 The COVID-19 communications response has also challenged the current understanding of the  
4 CMOH position and highlighted tensions between their crisis and non-crisis roles. There is an  
5 expectation within the public health community that CMOHs serve as autonomous experts who  
6 provide the public and policymakers with the best available scientific evidence and, in some  
7 cases, serve as advocates who voice independent critiques of government policy (1,2). These  
8 expectations are inconsistent with the realities and demands of emergency situations for two  
9 reasons. First, the COVID-19 experience has made clear that CMOHs are not the only voices  
10 that bring the available evidence to bear on the pandemic response. Not only are they part of a  
11 broader government scientific advisory system, but amid extraordinarily high stakes, experts and  
12 non-specialists outside of government have publicly challenged the accuracy, timeliness,  
13 appropriateness, and interpretation of the evidence underlying government advice and policy  
14 choices (e.g. 14–17).  
15  
16  
17  
18  
19

20 The pandemic communications model examined here also reveals a second, more structural flaw  
21 in the design of the CMOH role across Canada. The expectation that CMOHs serve an advocacy  
22 role – already in tension during non-crisis times (1,2) – breaks down in emergency situations.  
23 Whereas during non-crisis situations CMOHs are positioned as credible scientific experts who  
24 may have autonomy to comment on government policy, during an emergency they are called on  
25 to be reliable team players who contribute to a rapid, coordinated and unified government  
26 response. During the COVID-19 crisis, CMOHs’ messaging has been highly interconnected with  
27 that of elected officials, as noted through the marked absence of any challenges to their own  
28 provincial governments’ responses to the pandemic in our analysis. Additionally, the frequency  
29 with which CMOH messages were delivered as joint statements alongside government officials  
30 presents the CMOH as one member of a team responding to the outbreak rather than as an  
31 independent voice. The more the CMOH is integrated into communications issued by the  
32 government, the greater the likelihood that they will be perceived as a government spokesperson,  
33 potentially also implying endorsement of government policy decisions. This perception can then  
34 compromise the degree to which they are viewed as independent experts during non-crisis  
35 situations.  
36  
37  
38  
39  
40  
41  
42

43 In light of these challenges seen during COVID-19, governments should consider how to  
44 optimize the CMOH role for both crisis and non-crisis situations. Particular consideration should  
45 be given to whether it is possible for one person to credibly act as an independent voice during  
46 non-crisis situations and the face of the government response during emergencies.  
47  
48

#### 49 Limitations

50 Since we focused on official news releases issued on government websites, we did not capture  
51 messaging issued through other channels. In provinces that favoured other communication  
52 methods or did not explicitly include the CMOH in their communications, relatively fewer news  
53 releases were available for us to analyze. While this may have restricted the number of messages  
54  
55  
56  
57  
58  
59  
60



1  
2  
3 that we were able to draw upon for our analysis, our emphasis on this method of communication  
4 was deliberate. Given that official news releases are highly regulated communications, they may  
5 be presumed to reflect the official position of the CMOH and the provincial government.  
6  
7

### 8 Conclusion

9  
10 While the Canadian response to COVID-19 has generally been praised, it has also been criticized  
11 for a lack of cross-provincial uniformity. Our analysis indicates that the response has in fact been  
12 surprisingly consistent, with the country's top doctors delivering similar messages to the public  
13 and recommending very similar responses. Where variation was documented, we believe it was  
14 appropriate for the local context. Tailoring a pandemic response to the needs of the population  
15 may be more appropriate than issuing a one-size-fits-all approach that may not suit the different  
16 ways in which each province experiences the outbreak. The ability of CMOHs to issue  
17 recommendations that align with their provinces' unique circumstances should be viewed as a  
18 strength rather than evidence of a lack of coordination.  
19  
20  
21  
22  
23

24 Data Sharing Statement: Data were derived from publicly available sources but can be provided  
25 upon request to the corresponding author.  
26  
27  
28

### 29 **References**

- 30  
31
- 32 1. Fafard P, McNena B, Suszek A, Hoffman SJ. Contested roles of Canada's Chief Medical  
33 Officers of Health. *Canadian Journal of Public Health* [Internet]. 2018 Jun 12; Available  
34 from: <https://doi.org/10.17269/s41997-018-0080-3>  
35
  - 36 2. Fafard P, Forest P-G. The loss of that which never was: Evaluating changes to the senior  
37 management of the Public Health Agency of Canada. *Canadian Public Administration*.  
38 2016;59(3):448–66.  
39
  - 40 3. Kennedy EB, Vikse J, Chaufan C, O'Doherty K, Wu C, Qian Y, et al. Canadian COVID-19  
41 Social Impacts Survey Rapid Summary of Results #1: Risk Perceptions, Trust, Impacts, and  
42 Responses [Internet]. Toronto: York University; 2020 Apr [cited 2020 Apr 28]. Available  
43 from: [https://figshare.com/articles/Canadian\\_COVID-19\\_Social\\_Impacts\\_Survey\\_-  
44 \\_Summary\\_of\\_Results\\_1\\_Risk\\_Perceptions\\_Trust\\_Impacts\\_and\\_Responses/12121905](https://figshare.com/articles/Canadian_COVID-19_Social_Impacts_Survey_-_Summary_of_Results_1_Risk_Perceptions_Trust_Impacts_and_Responses/12121905)  
45  
46
  - 47 4. Picard A. To combat the coronavirus, we need a unified message from coast to coast. *The*  
48 *Globe and Mail* [Internet]. 2020 Mar 17 [cited 2020 May 5]; Available from:  
49 [https://www.theglobeandmail.com/canada/article-to-combat-the-coronavirus-we-need-a-  
50 unified-message-from-coast-to/  
51](https://www.theglobeandmail.com/canada/article-to-combat-the-coronavirus-we-need-a-unified-message-from-coast-to/)  
52
  - 53 5. Mendleson R. Should we wear masks to slow COVID-19? Canada's top public health doctor  
54 now says non-medical masks could prevent some spread. *The Toronto Star* [Internet]. 2020  
55 Apr 3 [cited 2020 May 5]; Available from:  
56  
57  
58  
59  
60

1  
2  
3 <https://www.thestar.com/news/canada/2020/04/03/should-we-all-wear-masks-to-slow-covid-19-some-experts-are-shifting-their-advice.html>  
4  
5

- 6  
7 6. Le gouvernement du Québec annonce la fermeture des écoles, des cégeps, des universités et  
8 des services de garde [Internet]. Gouvernement du Québec; 2020 [cited 2020 Mar 31].  
9 Available from: <https://www.quebec.ca/en/premier/actualites/detail/le-gouvernement-du-quebec-annonce-la-fermeture-des-ecoles-des-cegeps-des-universites-et-des-services/>  
10  
11
- 12  
13 7. Le gouvernement du Québec déclare l'état d'urgence sanitaire, interdit les visites dans les  
14 centres hospitaliers et les CHSLD et prend des mesures spéciales pour offrir des services de  
15 santé à distance [Internet]. Gouvernement du Québec; 2020 [cited 2020 Apr 2]. Available  
16 from: [https://www.quebec.ca/en/premier/actualites/detail/le-gouvernement-du-quebec-  
17 declare-l-etat-d-urgence-sanitaire-interdit-les-visites-dans-les-centres-h/](https://www.quebec.ca/en/premier/actualites/detail/le-gouvernement-du-quebec-declare-l-etat-d-urgence-sanitaire-interdit-les-visites-dans-les-centres-h/)  
18
- 19  
20 8. Saskatchewan Keeping Schools Open For Now [Internet]. Government of Saskatchewan;  
21 2020 [cited 2020 Mar 24]. Available from: [https://www.saskatchewan.ca/government/news-  
22 and-media/2020/march/15/keeping-schools-open-for-now](https://www.saskatchewan.ca/government/news-and-media/2020/march/15/keeping-schools-open-for-now)
- 23  
24 9. Twelve new cases of COVID-19; one previously confirmed has recovered [Internet].  
25 Government of New Brunswick; 2020 [cited 2020 Apr 5]. Available from:  
26 [https://www2.gnb.ca/content/gnb/en/news/news\\_ release.2020.03.0159.html](https://www2.gnb.ca/content/gnb/en/news/news_release.2020.03.0159.html)  
27
- 28  
29 10. Update 2: COVID-19 pandemic in Alberta [Internet]. Government of Alberta; 2020 [cited  
30 2020 Mar 24]. Available from: [https://www.alberta.ca/release.cfm?xID=69818C355F188-  
31 C2A3-F5C6-875A2A33929D5C05](https://www.alberta.ca/release.cfm?xID=69818C355F188-C2A3-F5C6-875A2A33929D5C05)
- 32  
33 11. Joint statement on update on new and existing COVID-19 cases in B.C. [Internet].  
34 Government of British Columbia; 2020 [cited 2020 Mar 20]. Available from:  
35 <https://news.gov.bc.ca/releases/2020HLTH0077-000484>  
36
- 37  
38 12. Twenty New Cases of COVID-19 in Nova Scotia [Internet]. Government of Nova Scotia;  
39 2020 [cited 2020 Mar 31]. Available from:  
40 <https://novascotia.ca/news/release/?id=20200331001>
- 41  
42 13. Prince Edward Island confirms seven additional COVID-19 cases [Internet]. Government of  
43 Prince Edward Island; 2020 [cited 2020 Mar 31]. Available from:  
44 [https://www.princeedwardisland.ca/en/news/prince-edward-island-confirms-seven-  
45 additional-covid-19-cases](https://www.princeedwardisland.ca/en/news/prince-edward-island-confirms-seven-additional-covid-19-cases)
- 46  
47 14. Roman K. Missed opportunities to address COVID-19 early may prolong response measures,  
48 experts say. CBC News [Internet]. 2020 Apr 11 [cited 2020 May 4]; Available from:  
49 <https://www.cbc.ca/news/politics/covid-19-canada-federal-response-1.5529263>  
50
- 51  
52 15. Vipond J. The case for mandatory mask-wearing in Canada. Macleans [Internet]. 2020 Apr  
53 20 [cited 2020 May 4]; Available from: [https://www.macleans.ca/society/health/the-case-for-  
54 mandatory-mask-wearing-in-canada/](https://www.macleans.ca/society/health/the-case-for-mandatory-mask-wearing-in-canada/)  
55  
56  
57  
58  
59  
60

- 1
  - 2
  - 3
  - 4
  - 5
  - 6
  - 7
  - 8
  - 9
  - 10
  - 11
  - 12
  - 13
  - 14
  - 15
  - 16
  - 17
  - 18
  - 19
  - 20
  - 21
  - 22
  - 23
  - 24
  - 25
  - 26
  - 27
  - 28
  - 29
  - 30
  - 31
  - 32
  - 33
  - 34
  - 35
  - 36
  - 37
  - 38
  - 39
  - 40
  - 41
  - 42
  - 43
  - 44
  - 45
  - 46
  - 47
  - 48
  - 49
  - 50
  - 51
  - 52
  - 53
  - 54
  - 55
  - 56
  - 57
  - 58
  - 59
  - 60
16. Viner RM, Russell SJ, Croker H, Packer J, Ward J, Stansfield C, et al. School closure and management practices during coronavirus outbreaks including COVID-19: a rapid systematic review. *The Lancet Child & Adolescent Health*. 2020 May;4(5):397–404.
17. Kirkey S. COVID-19 modelling numbers are scary. Have we mortgaged our future on an inexact science? *National Post* [Internet]. 2020 Apr 8 [cited 2020 May 4]; Available from: <https://nationalpost.com/news/covid-19-modelling-numbers-are-scary-have-we-mortgaged-our-future-on-an-inexact-science>

Confidential

Table 1. Coding summary of provincial news releases issued by and with Chief Medical Officers of Health

|                                                                                |                                                                       | Province       |                |                |                 |                |                 |                 |                 |                 |                |                  |
|--------------------------------------------------------------------------------|-----------------------------------------------------------------------|----------------|----------------|----------------|-----------------|----------------|-----------------|-----------------|-----------------|-----------------|----------------|------------------|
|                                                                                |                                                                       | BC             | AB             | SK             | MB              | ON             | QC              | NB              | NS              | PE              | NL             | Total            |
| <b>First COVID-19 News Release</b>                                             |                                                                       | 21 January     | 14 March       | 13 February    | 28 January      | 25 January     | 22 January      | 1 March         | 28 February     | 28 February     | 10 March       | -                |
| <b>News Releases Primarily Issued by CMOHs or Jointly with other Officials</b> |                                                                       | Joint          | Joint          | Joint          | Joint           | Mixed          | Joint           | Mixed           | Joint           | Solo            | Joint          | -                |
| <b>Number of News Releases</b>                                                 |                                                                       | N=56<br>(100%) | N=23<br>(100%) | N=29<br>(100%) | N= 44<br>(100%) | N=41<br>(100%) | N= 15<br>(100%) | N= 25<br>(100%) | N= 29<br>(100%) | N= 20<br>(100%) | N= 7<br>(100%) | N= 290<br>(100%) |
| Describing Preparedness and Capacity-Building                                  | <b>Increasing and Improving Testing and Case Identification</b>       | n=19<br>(34%)  | n=2<br>(9%)    | n=7<br>(24%)   | n=9<br>(20%)    | n=4<br>(10%)   | n=3<br>(20%)    | n=5<br>(20%)    | n=9<br>(31%)    | n=1<br>(5%)     | -              | N=59<br>(20%)    |
|                                                                                | <b>Emergency Preparedness and Contingency Planning</b>                | n=17<br>(30%)  | n=1<br>(4%)    | n=11<br>(38%)  | n=12<br>(27%)   | n=21<br>(51%)  | n=4<br>(27%)    | n=6<br>(24%)    | n=13<br>(45%)   | n=3<br>(15%)    | -              | N=88<br>(30%)    |
| Issuing Recommendations and Mandates                                           | <b>Cancellations, Closures, and Social Distancing Recommendations</b> | n=26<br>(46%)  | n=19<br>(83%)  | n=18<br>(62%)  | n=22<br>(50%)   | n=14<br>(34%)  | n=5<br>(33%)    | n=13<br>(52%)   | n=16<br>(55%)   | n=16<br>(80%)   | n=5<br>(71%)   | N=154<br>(53)    |
|                                                                                | <b>Travel-related Recommendations/Restrictions</b>                    | n=11<br>(20%)  | n=5<br>(22%)   | n=12<br>(41%)  | n=25<br>(57%)   | -              | n=4<br>(27%)    | n=6<br>(24%)    | n=26<br>(90%)   | n=10<br>(50%)   | n=2<br>(29%)   | N=101<br>(35)    |
|                                                                                | <b>Enforcement of Restrictions</b>                                    | n=4<br>(7%)    | n=5<br>(22%)   | -              | n=2<br>(5%)     | n=1<br>(2%)    | -               | n=2<br>(8%)     | n=2<br>(7%)     | n=6<br>(30%)    | -              | N=22<br>(8)      |
|                                                                                | <b>Characterization of Pandemic as Serious/Emergency Situation</b>    | n=5<br>(9%)    | n=2<br>(9%)    | n=5<br>(17%)   | n=6<br>(14%)    | n=7<br>(17%)   | n=3<br>(20%)    | n=2<br>(8%)     | n=2<br>(7%)     | n=3<br>(15%)    | n=1<br>(14%)   | N=36<br>(12)     |
| Expressing Reassurance and Encouraging the Public                              | <b>Public Reassurance</b>                                             | n=27<br>(48%)  | n=3<br>(13%)   | n=8<br>(28%)   | n=9<br>(20%)    | n=19<br>(46%)  | n=10<br>(67%)   | n=5<br>(20%)    | n=4<br>(14%)    | n=3<br>(15%)    | n=1<br>(14%)   | N=89<br>(31)     |
|                                                                                | <b>Acknowledgement of Community Cooperation/Contributions</b>         | n=11<br>(20%)  | n=5<br>(22%)   | -              | n=2<br>(5%)     | n=1<br>(2%)    | n=8<br>(53%)    | n=3<br>(12%)    | n=5<br>(17%)    | n=3<br>(15%)    | -              | N=38<br>(13)     |
| Promoting Public Responsibility                                                | <b>Transmission Prevention as Collective Responsibility</b>           | n=16<br>(29%)  | n=14<br>(61%)  | n=4<br>(14%)   | n=4<br>(9%)     | n=4<br>(10%)   | n=6<br>(40%)    | n=12<br>(48%)   | n=10<br>(34%)   | n=1<br>(5%)     | n=1<br>(14%)   | N=72<br>(25)     |
|                                                                                | <b>Providing the Public with COVID-19 Information</b>                 | n=9<br>(16%)   | n=5<br>(22%)   | n=3<br>(10%)   | n=12<br>(27%)   | n=4<br>(10%)   | n=3<br>(20%)    | n=9<br>(36%)    | n=8<br>(28%)    | n=5<br>(25%)    | n=2<br>(29%)   | N=60<br>(21)     |

Table 2. Themes emphasized during different phases of the COVID-19 pandemic

| Late January – Early March 2020                                                                                                                                                                                                                                                                                                                                                                                                                                       | Mid-March 2020                                                                                                                                                                                                                                                                                                                                                                                                                                                                                                                                                                           | Late March 2020                                                                                                                                                                                                                                                                                                                                                                                                                                          |
|-----------------------------------------------------------------------------------------------------------------------------------------------------------------------------------------------------------------------------------------------------------------------------------------------------------------------------------------------------------------------------------------------------------------------------------------------------------------------|------------------------------------------------------------------------------------------------------------------------------------------------------------------------------------------------------------------------------------------------------------------------------------------------------------------------------------------------------------------------------------------------------------------------------------------------------------------------------------------------------------------------------------------------------------------------------------------|----------------------------------------------------------------------------------------------------------------------------------------------------------------------------------------------------------------------------------------------------------------------------------------------------------------------------------------------------------------------------------------------------------------------------------------------------------|
| LOCAL REASSURANCE                                                                                                                                                                                                                                                                                                                                                                                                                                                     | PUBLIC ACTION                                                                                                                                                                                                                                                                                                                                                                                                                                                                                                                                                                            | COLLECTIVE DUTY                                                                                                                                                                                                                                                                                                                                                                                                                                          |
| <p>“Je tiens à réitérer que le réseau de la santé est prêt et bien préparé à faire face à une apparition de cas au Québec. La population ne doit pas s’inquiéter. Bien que les cinq cas soient infirmés, comme la situation épidémiologique évolue rapidement, il est attendu et normal que d’autres cas soient investigués. Le Québec a mis en place un système de détection efficace et fiable, et demeure proactif et vigilant.” [QC’s Dr. Arruda, 24 January]</p> | <p>“Dr. Heather Morrison has confirmed the first positive case of COVID-19 in the province, and urges Islanders to follow recommendations to limit the potential number of cases and spread of the virus... It is strongly recommended that Islanders follow the advice of the Chief Public Health Office and... reconsider attending social gatherings where a 2-meter distance between people is not possible, especially if elderly or immune-compromised people are present” [PE news release citing Dr. Morrison, 14 March]</p>                                                     | <p>“We have to protect our health-care workers, so they can carry on with this important work... When we take actions to limit the spread of this disease, among those we are protecting are the front-line workers that are so valuable in this situation. When you stay home and practice social distancing, you are not only protecting yourselves, you are protecting the people who may soon be saving your life.” [NB’s Dr. Russell, 23 March]</p> |
| <p>“While the risk to residents in Saskatchewan remains low, we are working closely with the Public Health Agency of Canada on preparedness, procedures and reporting to quickly identify and manage any cases that present for care... Canada has multiple systems in place to prepare for, detect and respond to the spread of serious infectious diseases like novel coronavirus.” [SK’s Dr. Shahab, 13 February]</p>                                              | <p>“The new cases that have emerged today, particularly those demonstrating transmission into communities and school settings, means we need to put in place additional restrictions for schools, day cares, continuing care facilities, and worship gatherings. These decisions are not made lightly, and I know they will have a tremendous impact on Albertans’ day-to-day lives, particularly parents, children, and seniors. But it is crucial we do everything possible to contain and limit the spread of COVID-19.” [AB’s Dr. Hinshaw, 15 March]</p>                             | <p>“Given the number of returning travellers, including snowbirds, and more testing being done, an increase in cases is expected... We’re three weeks into our response and I know this is hard for everyone. Please continue to be part of flattening the curve by following public health advice and direction.” [NS’ Dr. Strang, 28 March]</p>                                                                                                        |
| <p>“The government and public health officials are reminding Manitobans the risk of acquiring COVID-19 in Manitoba remains low, but is increasing given events occurring in Canada and around the world. We must continue to prepare for this virus in Manitoba” [MB’s Dr. Roussin, 10 March]</p>                                                                                                                                                                     | <p>“This death is further evidence of the increasingly seriousness of the situation we are in, which is why the province has been taking decisive steps to manage the spread of COVID-19 in Ontario. Earlier today, the Ontario government enacted a declaration of emergency closing all facilities providing indoor recreational programs, public libraries, private schools, licensed child care centres, theatres, cinemas, concert venues and bars and restaurants, except to the extent that such facilities provide takeout food and delivery.” [ON’s Dr. Williams, 17 March]</p> | <p>“We are at a critical juncture in our provincial COVID-19 response. Every British Columbian has a part to play to flatten the curve. We must all do the right thing and be 100% committed” [BC’s Dr. Henry &amp; A. Dix, 31 March].</p>                                                                                                                                                                                                               |

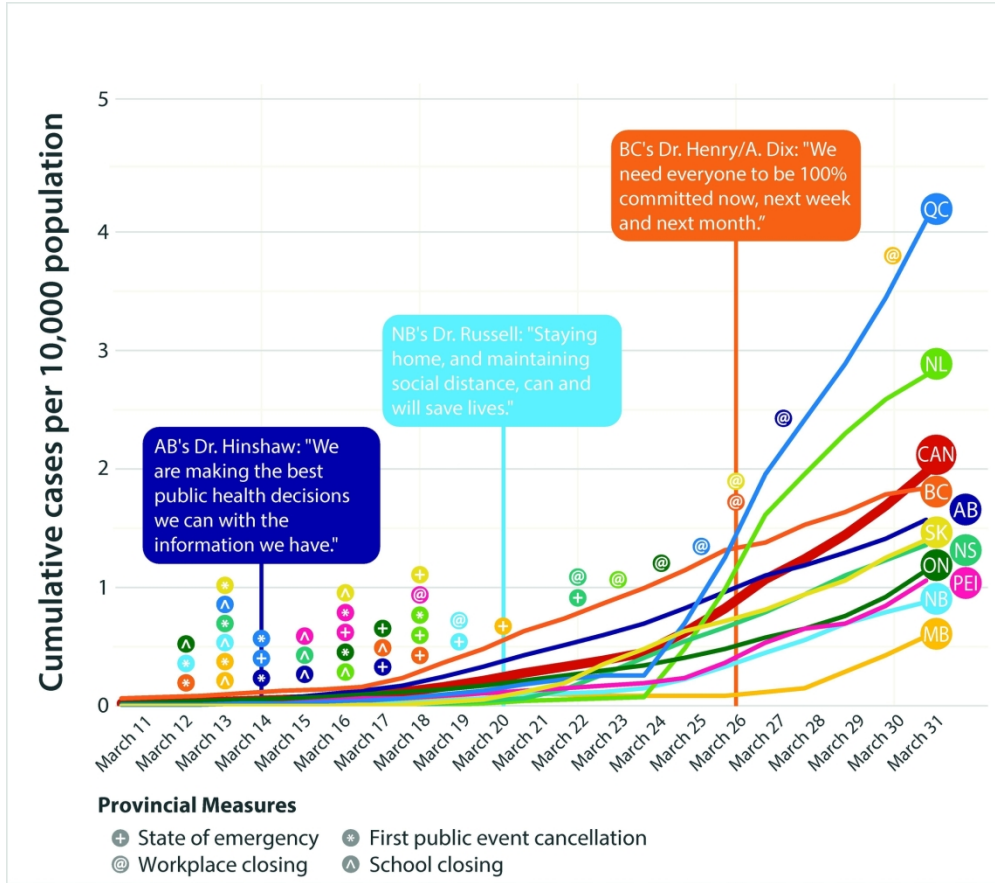

Figure 1. Trajectory of provincial cases, measures, and communications, March 11-31 2020\*

189x167mm (300 x 300 DPI)
